# Supplementary material for: Correlations Between the Characteristics of Alternative Splicing Events, Prognosis, and the Immune Microenvironment in Breast Cancer
Source: Front Genet. 2021 Jun 14;12:686298. doi: 10.3389/fgene.2021.686298 (PMC8236959; doi:10.3389/fgene.2021.686298)
Supplement: Supplementary file 2 [file Table_2.xlsx]

## Sheet: Sheet1
Table 2 Univariate analysis of the clinical characteristics of BrCa patients in the TCGA cohort and the clinicopathological characteristics of OS and DFS.
Characteristics	Number of Case (%)
	(n = 993)
Stage T
T 1	270(27.2%)
T 2	568(57.2%)
T 3	122(12.3%)
T 4/X	33(3.3)
Stage N
N 0	469(47.2%)
N 1	336(33.8%)
N 2	104(10.5%)
N 3/X	84(8.5%)
Stage M
M 0	822(82.8%)
M 1/X	171(17.2%)
TNM
Stage I	176(17.7%)
Stage II	565(56.9%)
Stage III	217(21.9%)
Stage IV/X	35(3.5%)
Pam50
Normal	36(3.6%)
Basal	176(17.7%)
Her 2	70(7.1%)
Lum A	526(53.0%)
Lum B	185(18.6%)
Recurrence
Yes	107(10.8%)
No	886(89.2%)
Survival status
Yes	136(13.7%)
No	857(86.3%)
Recurrence (5-years)
Yes	91(9.2%)
No	902(90.8%)
Survival status (5-years)
Yes	86(8.7%)
No	907(91.3%)
