# Supplementary material for: Correlations Between the Characteristics of Alternative Splicing Events, Prognosis, and the Immune Microenvironment in Breast Cancer
Source: Front Genet. 2021 Jun 14;12:686298. doi: 10.3389/fgene.2021.686298 (PMC8236959; doi:10.3389/fgene.2021.686298)
Supplement: Supplementary file 3 [file Table_3.XLSX]

## Sheet: Univariate cox
Supplementary Table S3-1: Univariate survival analyses of DEAS for OS and DFS
symbol	AS type	exons	from_exon	to_exon	Univariate analysis（OS）					Univariate analysis（DFS）
					HR	95%CI		p value		HR	95%CI		p value
TANK	AP	2.1			4.18763	1.77379	9.88632	0.00108459		4.56397	1.69707	12.2739	0.00263124
TANK	AP				0.238799	0.10115	0.563765	0.00108461		0.219102	0.0814709	0.589236	0.00263088
TCF12	AP	10			6.67365	2.13479	20.8628	0.00109841		1.25779	0.261326	6.05386	0.774819
DAPK2	ES	13.3:13.4:14:15.1:15.2	13.1	15.3	4.53947	1.81986	11.3233	0.00117921		1.3259	0.395716	4.44259	0.647489
ECHDC2	ES	0.00214236	2.1	6.2	13.6932	2.70072	69.4271	0.00158053		2.36032	0.151643	36.7383	0.539754
IP6K2	ES	11.4:11.5	11.2	11.9	6.18163	1.729	22.101	0.00507408		1.93533	0.418699	8.94555	0.397919
CORO7	ES	18.4	18.2	19	0.0194944	0.00114164	0.332882	0.00653396		0.0321444	0.00157365	0.656605	0.0255315
NR1H3	AP				2.8254	1.31014	6.09312	0.00807534		2.33829	1.00107	5.46176	0.049712
MAGED2	AP	3			4.83737	1.46163	16.0096	0.00983601		3.94805	1.05819	14.73	0.0409382
SGOL1	AT	9			19.4648	1.89772	199.649	0.0124423		1.45431	0.0970258	21.7986	0.78628
CCND3	AP	3.1			2.95633	1.26053	6.93347	0.0126906		3.18718	1.21898	8.33332	0.0180905
ZKSCAN5	AP	2			15.1968	1.76321	130.978	0.0132855		13.1762	1.37157	126.579	0.0255042
SLC50A1	AP				0.00129499	6.63405e-06	0.252786	0.0134726		2.0096	0.012138	332.714	0.788907
NFIB	AP	5			0.0593187	0.00621769	0.565918	0.0141015		0.0124476	0.000772478	0.200578	0.0019831
CYB561A3	RI	6.5:6.6	6.4	6.7	0.0086884	0.000186357	0.405073	0.0154794		0.23447	0.0069475	7.91312	0.419177
ZBTB45	AD	1.2	1.1	3	5.02876	1.35722	18.6324	0.015647		6.63993	1.53748	28.6759	0.0112049
CSDE1	ES	0.0854167	1	4	0.256031	0.0832324	0.787576	0.0174784		0.388628	0.113876	1.32629	0.131277
UNKL	AP	17.1			2.5392	1.17073	5.50728	0.0183238		2.25658	0.909348	5.59979	0.0792523
DENND1A	ES	23	21	24	6.75933	1.33351	34.2619	0.0210266		3.19289	0.482461	21.1302	0.228574
TRIB1	AD	3.2	3.1	4	0.0155381	0.000444206	0.543516	0.0216686		0.32032	0.00931525	11.0147	0.528221
CCSER2	AP				0.374639	0.16078	0.872956	0.0229199		0.529858	0.209027	1.34313	0.180781
TPRG1	AP				1.70061	1.07607	2.68761	0.0229687		1.31116	0.759048	2.26486	0.331341
LRRC32	AP	2			3.57549	1.19043	10.7391	0.0231703		1.61323	0.462979	5.62122	0.452727
PCDHA5	AT	1.2			4.57675	1.21878	17.1866	0.0242568		7.02879	1.91636	25.7801	0.00327256
ELK4	AT	3.2			0.00552134	5.58131e-05	0.546202	0.0265577		0.124493	0.00137212	11.2954	0.365002
WEE1	AP	2			0.171127	0.0353956	0.827343	0.0281131		0.249293	0.0436981	1.42219	0.117924
ZNF561	ES	5.2	4	6.2	4.95853	1.17552	20.9159	0.0292461		0.479937	0.074798	3.07949	0.438915
ACAN	AT	10.2			0.300388	0.101471	0.889249	0.0298602		0.419914	0.134633	1.30969	0.134888
DST	AT	39			0.348885	0.134368	0.905871	0.0305386		0.250633	0.0820343	0.76574	0.0151669
RPS21	AA	3.3:3.4	3.1	3.5	2.7554	1.09767	6.91665	0.0308954		1.36061	0.476413	3.88584	0.565205
HNRNPF	AP	2			0.0521736	0.00354858	0.767091	0.0312954		0.0261143	0.00118717	0.57444	0.020806
NBPF14	ES	0.59375	13	16	1.81522	1.05468	3.12417	0.0313861		1.25979	0.678883	2.33776	0.464087
RAB7A	ES	3.2:4.1:5.1	3.1	5.2	0.0405283	0.00216286	0.75943	0.0320322		0.0240157	0.000785737	0.734032	0.0325839
LRRC49	AP				0.206975	0.048642	0.880693	0.0330137		0.777664	0.20186	2.99594	0.714795
FKBP8	AP	2			0.00540247	4.21489e-05	0.692465	0.0349988		0.0329948	0.000198651	5.48023	0.190939
LIMCH1	AP				2.89087	1.07444	7.77815	0.035541		2.92425	0.98157	8.71181	0.0540338
PDP1	ES	2.2	1.1	3	3.7914	1.08051	13.3036	0.037446		2.67072	0.61956	11.5126	0.187585
MAP1LC3A	AP				1.8853	1.03747	3.426	0.0374638		1.0241	0.501038	2.0932	0.947953
JUP	AT	22			0.207293	0.0467369	0.919406	0.0384032		1.196	0.25467	5.61671	0.820586
RNF165	AT	1.5			0.44948	0.2095	0.964355	0.0400576		0.415907	0.175088	0.987951	0.0468753
GLUL	AD	1.3:1.4	1.2	2	0.348483	0.126994	0.95627	0.0406795		0.687436	0.233406	2.02466	0.496482
GK	ES	12	11	13	3.5423	1.05462	11.8981	0.0407574		4.39271	1.32456	14.5678	0.0155426
ACTN1	ES	20	19	21	0.161731	0.0278984	0.937573	0.0421682		1.23781	0.225791	6.78582	0.805872
PLEKHG5	AP	7			0.122846	0.0161166	0.936365	0.0430307		0.975062	0.141722	6.70851	0.979525
MAP2K7	ES	2	1	3	0.358041	0.130917	0.979193	0.0454004		0.640597	0.213564	1.9215	0.426824
EPHA7	AT	3.2			2.83359	1.01791	7.88795	0.0461574		1.7694	0.547024	5.72332	0.340717
GSN	AP	14			0.0794919	0.00635032	0.995063	0.049553		1.67427	0.178032	15.7453	0.652199
IP6K2	ES	11.4:11.5:11.6:11.7	11.2	11.9	6.05496	1.00092	36.6291	0.0498837		6.30308	0.872557	45.5314	0.0680257
NCALD	AP	2			2.15999	0.999645	4.66723	0.0501058		0.791597	0.31242	2.00572	0.622237
IFNLR1	AT	7.2			0.128003	0.0162877	1.00596	0.0506645		1.69443	0.274844	10.4462	0.569869
NFATC4	AP	7.1			2.48197	0.993858	6.19827	0.0515622		1.56567	0.538021	4.5562	0.410733
CNTNAP3	AT				0.0892428	0.00781558	1.01903	0.0517996		0.122965	0.00843094	1.79344	0.125334
MON1A	ES	2	1	3	0.102063	0.0101735	1.02391	0.0523949		0.11798	0.00944565	1.47362	0.0971161
USP6NL	AP	5			0.14449	0.0203497	1.02593	0.0530676		0.766798	0.12453	4.72158	0.774634
COX6C	AP	2.1			0.271151	0.0711271	1.03368	0.0559473		0.913785	0.222723	3.74907	0.900382
TSC22D1	AP				67.8417	0.891758	5161.14	0.0563745		32.3157	0.277671	3760.94	0.152137
TNC	ES	12:13:15:16:18:19	11	20	2.67272	0.972208	7.34766	0.0567362		2.49125	0.850274	7.29918	0.0960649
ABCA2	RI	4.2:4.3:4.4:4.5	4.1	4.6	0.379966	0.139753	1.03307	0.057932		0.967283	0.341904	2.73655	0.950013
CLDN11	AT	5			2.08025	0.975206	4.43747	0.0580908		1.71829	0.73632	4.00983	0.210562
MROH1	AT	14			3.00515	0.961124	9.39619	0.0585189		0.529199	0.118831	2.35672	0.403682
CD44	ES	8:9.2:10:11:12.1:13:14	5	15	5.07388	0.938253	27.4385	0.0593013		4.70458	0.718232	30.8161	0.106347
PPIH	AP	2.1			0.016917	0.000230941	1.23922	0.0625941		0.461425	0.0073447	28.9887	0.714268
COL6A3	ES	4	2	5	0.271214	0.0676062	1.08802	0.0656296		0.815867	0.192583	3.45637	0.782339
TAOK3	AP	15.1			3.55933	0.918727	13.7896	0.0661667		1.40695	0.233322	8.484	0.709568
MMP19	RI	6.7	6.6	6.8	0.0225725	0.000391161	1.30258	0.0669211		0.121838	0.001778	8.34903	0.329054
EGFLAM	AP				2.06154	0.94831	4.48161	0.0678497		0.882012	0.340164	2.28697	0.796199
MXI1	AP				2.3664	0.936276	5.98099	0.0686404		1.83755	0.650874	5.18778	0.250559
P4HA3	AT	16			0.0930412	0.0071549	1.20989	0.0696178		0.0654841	0.00334779	1.28089	0.0723694
CCL28	AP	2			1.61643	0.958164	2.72693	0.0718933		1.03873	0.552864	1.95157	0.905998
TPD52	ES	10	8	11	1.44423	0.963431	2.16496	0.0751418		0.771342	0.446043	1.33388	0.352869
CCDC158	AT	9			0.368885	0.122989	1.10641	0.075154		0.843372	0.251356	2.82976	0.782696
PCLO	AT	25			0.00716766	3.1104e-05	1.65173	0.0752129		0.0253361	7.20273e-05	8.91218	0.219178
CA6	AT	3			1.7694	0.942339	3.32234	0.0758636		1.44834	0.722225	2.90449	0.296783
RIMKLB	AP				3.25815	0.880826	12.0518	0.076756		0.675469	0.100594	4.53563	0.68635
COL18A1	AP				0.373115	0.125189	1.11203	0.0768301		1.43635	0.530067	3.89216	0.476495
MZB1	AA	2.1:2.2	1	2.3	2.77748	0.893739	8.63158	0.0774332		1.17651	0.284862	4.85909	0.822267
RAPGEF3	AP	3			0.183245	0.0278008	1.20783	0.0777809		0.54844	0.0726483	4.14031	0.560293
H2AFY	AP				3.71033	0.863116	15.9498	0.0780488		0.223928	0.0214137	2.34167	0.211482
SEPT8	AT	14			0.0181095	0.000181487	1.80705	0.0876327		1.33881	0.0149899	119.576	0.898697
CLDND1	ES	3.3:3.4	1	4.1	12.8904	0.68322	243.204	0.0880478		2.13305	0.0628827	72.3556	0.673515
RIC8B	ES	0.551389	11	17	0.0689163	0.00318414	1.4916	0.088179		6.60543	0.452499	96.4239	0.167517
SEPT9	AP	6.1			3.05629	0.846096	11.04	0.0882087		3.89771	0.949551	15.9993	0.0590102
RPL13	AD	1.3:1.4	1.2	2	2.08279	0.894965	4.84715	0.0886671		0.822622	0.277766	2.43625	0.724475
SERPINB5	AT	5.2			1.76858	0.910813	3.43417	0.0921716		1.22974	0.570261	2.65187	0.597883
RARB	AP				2.73809	0.840111	8.92396	0.0947319		3.7625	1.08726	13.0203	0.0364342
FAM72A	AP				0.424039	0.154584	1.16318	0.0956394		0.789252	0.280739	2.21885	0.653606
GNAS	AP	2			1.80693	0.899604	3.62936	0.0963856		0.704821	0.294824	1.68498	0.431486
TNC	ES	12:13:14:15:16:18:19	11	20	1.77618	0.899136	3.50871	0.0981544		1.23566	0.570337	2.6771	0.591658
MTA1	ES	19	18	20	2.5424	0.834395	7.7467	0.100699		2.41865	0.748515	7.81527	0.139968
MORF4L2	AP				0.0892623	0.00497483	1.60161	0.10096		0.631802	0.0257569	15.4978	0.778516
CA6	AT	10			0.575639	0.297172	1.11504	0.101597		0.708673	0.339753	1.47818	0.358586
PPP1R1A	AT	8			1.91805	0.877651	4.19178	0.102512		2.11181	0.88343	5.0482	0.0927206
ARHGAP19	AP				2.05957	0.855689	4.95719	0.106918		1.45278	0.559988	3.76896	0.442575
ARHGAP19	AP	2			0.485539	0.201727	1.16865	0.106918		0.688335	0.265325	1.78575	0.442575
HDAC7	AP	3			2.65132	0.810133	8.67695	0.106987		0.480159	0.0848382	2.71756	0.406799
TMEM184A	AP				2.95769	0.786333	11.125	0.108639		1.09596	0.189998	6.32178	0.918372
ANKRD46	AD	1.2	1.1	2.2	0.100953	0.00611441	1.66679	0.108968		0.901454	0.0722441	11.2482	0.935789
ODF2	AP				2.09527	0.844363	5.19938	0.110681		0.959631	0.337678	2.72713	0.938365
PINLYP	AP				0.284913	0.0603181	1.34579	0.112955		0.80477	0.181111	3.57602	0.775316
SYBU	AP	9			3.62479	0.728855	18.0271	0.1156		0.630218	0.0811392	4.89498	0.658899
CDCA5	RI	5.2	5.1	5.3	0.0369515	0.000607023	2.24936	0.115656		0.690855	0.0198562	24.0368	0.838185
PCDHA1	AT	1.3			3.0933	0.752504	12.7155	0.117417		5.81642	1.34859	25.086	0.0182262
DIXDC1	AT	7.2			0.267433	0.0511083	1.39939	0.11829		0.22229	0.0314015	1.57358	0.132079
LRRIQ3	AT	11			0.402643	0.128512	1.26153	0.118465		0.822878	0.268112	2.52554	0.733311
PRKACA	AP	2			1.66987	0.875733	3.18414	0.119466		1.50125	0.691798	3.25782	0.304024
CD44	ES	8:9.1:9.2:10:11:12.1:13:14	5	15	3.3148	0.729581	15.0605	0.120728		2.44349	0.434808	13.7317	0.310405
ANK2	ES	42	41	43	1.82587	0.851088	3.91709	0.12212		0.717375	0.241878	2.12763	0.549293
TBC1D16	AT	12			0.0505932	0.00114398	2.23751	0.122734		0.172287	0.00311414	9.53163	0.390418
SH3BP2	AP	4			0.343113	0.0881169	1.33603	0.123006		0.863583	0.18869	3.95238	0.850097
ITGB4	ES	35	34	36	2.19968	0.803012	6.02553	0.125212		0.850922	0.229624	3.15327	0.809125
MBNL2	ES	9	8	10	2.03887	0.816539	5.09099	0.127047		1.34961	0.469654	3.87829	0.577738
TMEM237	AP	2			2.11864	0.805167	5.57478	0.128272		0.988179	0.336298	2.90366	0.982748
EML3	AP	4.1			2.42116	0.773556	7.57799	0.128783		0.326046	0.0629208	1.68952	0.181821
GBGT1	AT	4			12.0254	0.485309	297.973	0.128881		1.78868	0.0369297	86.634	0.768976
EEF1D	AP	2			9.09582	0.525676	157.386	0.12905		18.019	0.729935	444.812	0.0771399
TMEM145	AT	16			0.584727	0.292418	1.16924	0.12908		1.07807	0.492806	2.35841	0.850706
AFAP1	ES	13	12	14	0.180943	0.0198212	1.65178	0.129728		0.509264	0.0560821	4.62447	0.548847
STARD10	AP				2.04484	0.809868	5.16303	0.1301		0.512017	0.157394	1.66564	0.266039
GCNT2	AP	7			0.263754	0.0463698	1.50024	0.132934		0.836119	0.172522	4.0522	0.8241
FBLN5	AP	2			0.162439	0.0148424	1.77778	0.136571		0.0410846	0.0022606	0.74668	0.0309752
HIRA	AP				0.630522	0.342116	1.16206	0.139276		1.5593	0.816432	2.97809	0.178423
PQLC1	ES	0.254965	5	10	0.40342	0.120649	1.34894	0.140493		0.396722	0.105245	1.49544	0.172075
TMEM8B	AP				0.0803549	0.00280887	2.29876	0.140614		1.15114	0.0791447	16.743	0.917929
SULT1A4	AP	4			8.17177	0.499659	133.647	0.14066		0.145029	0.00494723	4.25153	0.262604
COL4A6	AT	52			1.56791	0.8617	2.85289	0.140861		1.12202	0.555448	2.26652	0.748258
DTNA	AP	2			0.183489	0.0189835	1.77356	0.142941		0.636772	0.0696296	5.82338	0.689381
DEPDC5	AA	28.1	27.1	28.2	1.91314	0.8025	4.56089	0.143307		1.34491	0.508059	3.56021	0.550765
OLFM2	AP	3			0.505685	0.202558	1.26244	0.144096		0.322037	0.103002	1.00685	0.0513883
FGF1	AP	5			1.70261	0.832075	3.48393	0.145188		0.9187	0.401506	2.10211	0.840868
ADD1	ES	18.2	17	19	4.44183	0.59185	33.3359	0.147078		2.88547	0.301187	27.6439	0.358032
TSSC4	ES	2	1	3.2	3.58688	0.632699	20.3346	0.149059		1.68435	0.218058	13.0105	0.617179
STRAP	ES	0.0854167	1	4	3.76569	0.619875	22.8763	0.149746		2.72694	0.359728	20.6717	0.331708
DLG1	AP	8			0.146736	0.0107316	2.00637	0.150391		0.325167	0.0209267	5.05258	0.422191
ATXN2L	ES	22.2:22.4:22.5	22.1	22.6	2.24263	0.745293	6.74819	0.150737		0.99324	0.275728	3.57789	0.991724
MCM7	AP				2.12989	0.755664	6.00326	0.152699		1.53856	0.47594	4.97369	0.471702
MCM7	AP	2			0.469524	0.166583	1.32338	0.152718		0.649965	0.201061	2.10113	0.471714
COL6A3	ES	6	5	7	0.355596	0.0859374	1.47141	0.153594		1.15153	0.220129	6.02387	0.867268
MCF2L	AP	8			2.23016	0.734857	6.76812	0.156761		0.649245	0.179242	2.35168	0.510686
SPIN2A	AP				1.9737	0.767517	5.07546	0.158275		1.17304	0.369347	3.72559	0.786629
LATS1	ES	4	3.2	5	0.0797521	0.00235253	2.70364	0.159516		0.405577	0.0131676	12.4923	0.605826
BIN1	ES	7	6	8	3.62922	0.600133	21.9472	0.160359		1.37333	0.147847	12.7566	0.780267
TTC7B	ES	18	17	19	3.12243	0.636547	15.3164	0.160535		0.818066	0.0929965	7.19631	0.85636
GNAS	AP	4.1			0.673964	0.388213	1.17005	0.160925		1.41273	0.777196	2.56796	0.25711
DPF2	ES	7	6	8	0.00897209	1.21245e-05	6.63931	0.162001		3.2109e-05	1.15825e-08	0.0890127	0.0105267
NEIL3	AT	10			2.16683	0.732509	6.4097	0.162285		1.44564	0.453521	4.60812	0.533212
NEIL3	AT	8.2			0.461512	0.156016	1.3652	0.162297		0.691738	0.217009	2.20498	0.533218
ATXN2L	ES	22.2:22.4:22.6	22.1	22.7	3.91735	0.563375	27.2387	0.167581		1.72258	0.163045	18.1992	0.651188
DST	AP				1.78652	0.78323	4.07499	0.167825		1.57124	0.594127	4.15531	0.362477
MUM1	ES	5.1:5.2	4	6	2.19401	0.716026	6.72278	0.169042		0.476017	0.125989	1.79851	0.273732
ADAM15	ES	21.2:22.1	20	23	1.74246	0.788432	3.85087	0.169923		1.06781	0.43658	2.6117	0.885678
COL16A1	ES	44	43	45.1	2.26057	0.702785	7.2713	0.171227		1.15548	0.321593	4.15164	0.824731
ARHGEF7	AP	5			2.65132	0.654548	10.7395	0.171889		4.41098	0.953862	20.3979	0.057498
PRSS23	AT	6			11.4268	0.346315	377.029	0.172087		0.144151	0.0019041	10.913	0.380286
RPL32	RI	1.2:1.3	1.1	1.4	2.54868	0.665442	9.7616	0.172098		0.994308	0.208687	4.73747	0.994282
APOD	ES	3	2	4	2.39573	0.680894	8.42942	0.173461		5.85626	1.54915	22.1385	0.00918517
MDK	AP				3.72978	0.556559	24.9951	0.175026		0.143675	0.0112077	1.84181	0.136038
NFYA	ES	3	2	4	0.332904	0.0676376	1.63852	0.176156		1.10161	0.212243	5.71772	0.908305
CLEC7A	AT	2.2			7.08369	0.412356	121.687	0.177212		1.30071	0.0469869	36.0068	0.876686
RPL32	RI	1.2	1.1	1.3	1.8768	0.751238	4.68878	0.177763		0.638771	0.225911	1.80614	0.398015
ZNF791	ES	2.1:2.2	1	3	0.326502	0.0640924	1.66327	0.177829		1.24436	0.291105	5.31914	0.768024
DNMT3A	AT	5.2			0.228206	0.0263171	1.97887	0.180032		0.0325934	0.00202482	0.524654	0.0157378
PC	AP	4			3.39185	0.55723	20.6462	0.185043		4.54991	0.689352	30.0307	0.11558
ZNF765	AT	9			0.144495	0.00813722	2.56585	0.18751		1.01765	0.0512459	20.2088	0.990844
C16orf45	ES	2	1	4	2.08965	0.698097	6.25508	0.187674		1.96086	0.579817	6.63133	0.278717
CSNK1G3	ES	13	12	14	1.98794	0.714785	5.52881	0.187981		2.43054	0.80724	7.31818	0.11429
DNAJC7	ES	3	1	4	7.99394	0.3606	177.213	0.188576		9.15257	0.274557	305.108	0.215905
COBLL1	ES	14	12	15	2.11949	0.690158	6.50899	0.18946		0.745665	0.177762	3.12787	0.688296
L3MBTL4	AT	19			2.09983	0.693191	6.36085	0.189546		1.19951	0.308191	4.66864	0.793035
PTPRM	AP	7			0.562774	0.238213	1.32954	0.189992		0.631426	0.244508	1.63062	0.342195
ATXN2L	ES	22.4:22.6	22.2	22.7	2.07788	0.689887	6.25839	0.19358		1.08923	0.274165	4.3274	0.903346
TACC1	AP	6			0.187403	0.014927	2.35277	0.194573		1.04816	0.0967416	11.3564	0.969139
C5orf38	ES	2.1:2.2:3.1:3.2	1	4	2.98962	0.568733	15.7154	0.195859		0.68784	0.0895986	5.28047	0.718972
CAMKK2	ES	17	16	19.1	0.242592	0.0280117	2.10095	0.198464		0.39504	0.040137	3.88809	0.425994
CDHR3	AP	2			0.674249	0.367388	1.23742	0.203257		0.78578	0.398397	1.54984	0.486648
LRRC46	RI	4.2:4.3:4.4	4.1	4.5	0.387213	0.0895283	1.67471	0.204142		2.02718	0.619559	6.63285	0.242651
SLC37A4	ES	2.1:2.2	1	3.1	0.390867	0.0906924	1.68456	0.207561		2.68079	0.680218	10.5652	0.158757
PPP6R2	ES	0.127778	2	5	0.127049	0.005041	3.20203	0.210164		0.310402	0.0125097	7.702	0.475223
CHEK1	AP	2.1			1.73889	0.731417	4.1341	0.210532		1.98361	0.728571	5.40056	0.180152
GAS7	AP	4			0.513101	0.180207	1.46095	0.211338		0.232351	0.0607607	0.888518	0.0329508
PCYT2	AA	3.1	2	3.2	0.261187	0.0316298	2.15679	0.212624		1.09592	0.135192	8.88394	0.931636
ADAM15	ES	21.1:21.2:22.1	20	23	1.65042	0.749594	3.63382	0.213421		1.02887	0.424417	2.49419	0.949767
TNC	ES	12:13:14:15:16:19	11	20	1.62115	0.756928	3.4721	0.213756		1.4882	0.645233	3.43248	0.351127
CD44	ES	7:8:9.2:10:11:12.1:13:14	5	15	1.54098	0.779189	3.04757	0.213922		1.2038	0.554089	2.61536	0.639401
WNK1	ES	15	13.2	16	0.461324	0.135174	1.57441	0.216732		0.296816	0.0764069	1.15303	0.0793787
C16orf89	AA	9.1	8	9.2	1.66317	0.73936	3.74125	0.218731		0.926951	0.332096	2.58731	0.884838
LONRF1	AP	2			0.45227	0.127337	1.60635	0.219812		1.05859	0.276941	4.04635	0.933677
ATXN2L	ES	22.2:22.4:22.5:22.6	22.1	22.7	1.77486	0.704106	4.47392	0.223894		0.906879	0.321835	2.55544	0.853286
AAK1	AT	22			0.0128052	1.1384e-05	14.4039	0.224069		33.193	0.0357465	30822	0.315133
MTMR1	ES	4	3	5	0.385416	0.0827271	1.79561	0.224594		0.310987	0.0525201	1.84145	0.198046
UGP2	AP	2			2.23459	0.606219	8.23696	0.227047		1.82841	0.431589	7.74595	0.41266
PNKD	AT	13			0.511419	0.17209	1.51984	0.227554		0.357694	0.102054	1.2537	0.108137
WARS	AP	2.1			0.218583	0.01836	2.60232	0.228902		1.05553	0.0854555	13.0378	0.966389
EXOC7	ES	7:8.1:8.2	6	9	0.452701	0.124108	1.65129	0.230012		1.1538	0.317267	4.19601	0.828067
RUNX2	AP				1.61335	0.738458	3.52478	0.230303		1.73394	0.712027	4.22254	0.225497
RUNX2	AP	2.1			0.619829	0.283706	1.35417	0.230304		0.57672	0.236825	1.40444	0.225497
SPON2	AP				0.225911	0.0195926	2.60484	0.233061		0.325369	0.023803	4.44756	0.40007
VPS29	ES	3.1:3.2	1	5	0.29866	0.0408212	2.18509	0.233989		1.79062	0.235457	13.6175	0.573572
ARID5B	AP				1.66961	0.717768	3.8837	0.234018		1.1785	0.409549	3.39122	0.760692
ELMOD3	RI	7.2	7.1	7.3	0.26851	0.0305312	2.36144	0.235883		0.229046	0.0194412	2.6985	0.241541
EXOC6	AP				0.253238	0.0256343	2.50171	0.239882		1.96602	0.320552	12.0581	0.465072
MYO6	ES	34	33	35	2.57952	0.527512	12.6138	0.241935		1.20401	0.176684	8.20465	0.849612
HSPB7	AP				0.572346	0.223901	1.46306	0.243897		0.58974	0.206061	1.68781	0.324964
ERG	AP				0.319603	0.0467057	2.18701	0.245043		2.7671	0.527594	14.5127	0.228695
NGLY1	AP				2.25149	0.572535	8.85397	0.245355		3.63936	0.848447	15.6108	0.082078
RAD51	ME	4|5	3	6	0.181327	0.0101649	3.23463	0.245462		0.0971099	0.00281009	3.35588	0.197004
SORBS1	ES	25	24	26	0.444073	0.112764	1.74879	0.245742		0.834414	0.267433	2.60345	0.755181
TROAP	AT	10.2			0.471699	0.131426	1.69297	0.249127		0.169154	0.0376903	0.759165	0.0203597
ADAM15	ES	22.1	20	23	1.7628	0.669672	4.64025	0.250971		0.581312	0.180262	1.87463	0.363851
PHACTR2	AP				1.96671	0.617106	6.26788	0.252745		0.503553	0.101992	2.48614	0.39973
TPM1	AA	2.1	1	2.2	0.468733	0.127916	1.71761	0.2528		0.623825	0.14987	2.59663	0.516637
PQLC1	ES	0.254861	5	9	0.160623	0.00695307	3.71055	0.253661		0.022373	0.000559827	0.894117	0.0434413
LHFPL2	AP	4			0.279251	0.0312305	2.49695	0.253754		0.102397	0.00770002	1.36169	0.0843255
KIF21A	ES	24	23	25.2	0.357142	0.0606102	2.10444	0.255219		0.481879	0.0736934	3.151	0.446052
ITSN1	AT	24			3.36245	0.41351	27.3417	0.256751		2.75074	0.262611	28.8129	0.3985
C12orf76	ES	9.1	8	10.2	1.9449	0.613568	6.16499	0.258427		3.41602	0.985894	11.8361	0.0526773
FBLN5	ME	6|7	5	8	0.19657	0.011602	3.33043	0.259874		0.0680895	0.00230185	2.01411	0.119993
TNC	ES	12:13:15:16:19	11	20	1.53387	0.727528	3.23389	0.260974		2.18605	0.974099	4.90589	0.0579157
PSPH	AP	2.1			1.85424	0.628303	5.47221	0.263441		1.50196	0.444747	5.07229	0.512411
GPR56	AP	3.1			0.239282	0.0194319	2.94649	0.264253		0.462041	0.033691	6.33646	0.563304
SULT1A3	AP	4			2.07468	0.574635	7.49046	0.265209		0.326249	0.0711345	1.4963	0.149479
LAS1L	ES	9	8	10	0.188111	0.00991508	3.56887	0.26585		1.72268	0.0986487	30.0829	0.709361
CCDC107	RI	3.2	3.1	3.3	3.36799	0.393953	28.7937	0.267374		1.27449	0.0977165	16.6228	0.853151
ARHGEF39	AP	3			0.593653	0.23544	1.49687	0.269112		1.83337	0.621611	5.40733	0.272022
ISLR	AP	2			1.54188	0.712379	3.33724	0.271724		1.06755	0.444635	2.56312	0.883714
ISLR	AP				0.64857	0.299653	1.40376	0.271739		0.936746	0.390158	2.24907	0.883746
CCDC28B	AT	3			4.22431	0.320845	55.6183	0.273263		1.05573	0.0407914	27.3237	0.973936
CLSPN	AT	25			1.71152	0.651047	4.49935	0.275848		0.842189	0.296606	2.39133	0.747027
MEST	AP	3			0.646815	0.295077	1.41783	0.276561		1.80759	0.868723	3.76112	0.113302
FAM72A	AT	2			0.492368	0.137302	1.76564	0.276847		0.915004	0.236479	3.5404	0.897619
CCAR2	RI	21.2	21.1	21.3	3.1225	0.396949	24.5624	0.279259		0.726823	0.0407767	12.9552	0.828131
GFOD1	AT	2			0.287473	0.0299963	2.75502	0.279652		0.771473	0.072834	8.1716	0.829406
ZNF540	AP				0.61383	0.252994	1.48931	0.280506		1.23725	0.507765	3.01475	0.639427
AQP1	AP				0.523189	0.161269	1.69733	0.280644		1.06863	0.308557	3.70103	0.916585
ACOT7	AP	4			0.329345	0.043776	2.4778	0.280723		0.496634	0.0567633	4.34516	0.527087
ESR1	AP				1.82235	0.610857	5.43655	0.28187		0.842695	0.183276	3.87468	0.825966
ITGA7	AP				0.529433	0.165768	1.69091	0.283098		1.36953	0.423048	4.43354	0.599818
ZNF263	ES	0.00283681	2	6	0.382441	0.0659362	2.21822	0.283866		0.95436	0.154879	5.88074	0.959842
RPP38	AT	5			0.0856055	0.000934321	7.84346	0.286249		0.198541	0.00124052	31.7758	0.532408
ADAMTS4	RI	2.2	2.1	2.3	0.223406	0.0139125	3.58744	0.290006		0.358271	0.0172625	7.43564	0.507093
ASXL1	AT	7			0.225431	0.0142115	3.57592	0.290788		1.38924	0.0877322	21.9985	0.815551
AHRR	AT	5			0.408258	0.0772826	2.15669	0.29146		0.418044	0.0641979	2.72223	0.361578
RPS21	AD	3.2:3.3	3.1	3.5	1.65481	0.644845	4.2466	0.294864		0.904858	0.306974	2.66722	0.856159
RPS21	RI	3.2:3.3:3.4	3.1	3.5	0.807598	0.541076	1.2054	0.29568		0.967936	0.625102	1.4988	0.883857
HNRNPL	AP	2			0.324046	0.0389917	2.69303	0.296941		3.24851	0.464095	22.7384	0.235333
YME1L1	AA	3.1:3.2	2	3.3	0.229629	0.0141318	3.73126	0.300994		1.14286	0.102624	12.7273	0.913529
MYO19	ES	23	22	24	0.0913533	0.000975344	8.5564	0.301529		1.83792	0.014976	225.557	0.804129
DENND5B	AT	12.2			4.10077	0.279863	60.0878	0.30289		7.81023	0.464362	131.362	0.153495
PRKCE	AT	12			0.215808	0.0116013	4.01448	0.303915		1.60226	0.108291	23.7068	0.731657
CDCP1	AT	4.2			3.52747	0.317384	39.205	0.30492		4.38089	0.347596	55.2141	0.253196
SLC9B2	AP	5			1.82153	0.57823	5.73813	0.305694		0.363888	0.0696256	1.9018	0.23087
FAM117A	AP				1.94615	0.541412	6.99562	0.307716		0.840371	0.181368	3.89387	0.824077
NEDD9	AP				0.316044	0.0345065	2.89465	0.308029		0.0331122	0.00131489	0.833847	0.0384192
RPS3A	ES	2.1:2.2:3.1:3.2	1.3	4.1	1.76825	0.584294	5.35124	0.313039		1.46105	0.395865	5.39244	0.569297
LUC7L	ES	1.3	1.1	2.2	0.530259	0.154468	1.82027	0.313401		1.34862	0.386587	4.70468	0.638967
PRMT2	AD	1.2:1.3	1.1	2	0.143472	0.00326558	6.30337	0.314403		5.22459	0.143342	190.428	0.367492
ARAP1	AP	8.1			0.157444	0.00425127	5.83086	0.315771		1.09053	0.0376974	31.5473	0.95974
FRMD6	AP				0.24362	0.0153554	3.86513	0.316678		0.57298	0.0373434	8.79153	0.689363
SSBP3	ES	7	6	8	1.62662	0.624884	4.23422	0.318913		1.60679	0.550232	4.69218	0.385753
LRTOMT	ES	4	3	5	0.209242	0.00960357	4.55896	0.319745		1.18573	0.0705461	19.9294	0.905812
FAXDC2	AP				2.17996	0.468138	10.1514	0.320747		1.31305	0.233556	7.38194	0.757209
AK5	AP	14			1.34663	0.748357	2.42318	0.320772		1.16346	0.599288	2.25875	0.654665
DLX4	AT	2			0.390955	0.0611141	2.50099	0.32127		2.50186	0.379627	16.488	0.340489
PCNXL2	AT	22.2			3.48246	0.295095	41.0971	0.321776		2.55338	0.148386	43.9377	0.51846
PARPBP	ES	3	2	4.1	0.669231	0.302197	1.48205	0.322129		0.944509	0.399443	2.23335	0.89655
SULT1A3	AP				0.552778	0.16985	1.79902	0.324822		3.71729	1.0434	13.2435	0.0428157
TMEM87A	AP	2			0.243629	0.0145938	4.06714	0.325522		1.15667	0.0678977	19.7046	0.919857
AKAP9	ES	20	19	21	0.575467	0.190122	1.74184	0.328131		0.543395	0.155134	1.90338	0.340272
FAM49B	ES	7.1:9	6	10	0.333147	0.0367265	3.02198	0.328576		0.140487	0.0114421	1.72492	0.125059
KIF4A	AT	29			0.530534	0.148472	1.89576	0.329283		0.374902	0.0888718	1.58151	0.181601
KIF4A	AT	32			1.88482	0.527478	6.735	0.329308		2.66739	0.632314	11.2522	0.181597
TSHZ2	AP	2			1.48155	0.671453	3.26901	0.330298		1.68745	0.695526	4.09402	0.247256
FAXDC2	AP	5.1			0.712717	0.360243	1.41006	0.330627		1.42432	0.691083	2.93553	0.337773
PRKAR1A	ES	3.2	2.1	3.4	4.22165	0.226782	78.5877	0.33435		0.0632204	0.00118273	3.37933	0.173787
HTRA3	AT	7			3.53708	0.270804	46.1992	0.335266		3.6787	0.130631	103.596	0.44437
FDPS	ES	1.2:3.1	1.1	3.2	2.51954	0.384364	16.5158	0.335418		0.953288	0.10077	9.01812	0.966717
C2CD5	ES	0.0183704	25	28	0.314846	0.0297298	3.33429	0.337153		0.355194	0.0276382	4.56479	0.426901
CCSER1	AT	13			0.441283	0.0827288	2.35385	0.33819		0.841984	0.159394	4.44771	0.839495
ZFYVE21	ES	6.1	5	7	3.27842	0.287366	37.402	0.339085		0.142502	0.0056795	3.57544	0.236
SPSB3	AP	2.1			0.587236	0.196835	1.75196	0.339822		0.777611	0.234045	2.5836	0.681382
SORBS1	ES	20	19	23	1.68209	0.576761	4.90573	0.34097		1.50062	0.436757	5.15589	0.519235
IAH1	AP				0.185376	0.00575921	5.96681	0.341342		0.346488	0.00746401	16.0844	0.588301
CYB5RL	AT	4.3			1.52101	0.640479	3.61211	0.34194		1.71825	0.656104	4.49986	0.270462
SOX15	AT	1.4			1.62637	0.595758	4.43984	0.342533		0.762929	0.224611	2.59142	0.664494
CRTC1	ES	4	3	5	2.86524	0.325258	25.2403	0.34301		2.41714	0.204748	28.5354	0.483461
ERBB2IP	ES	24.1:24.3	21	25	0.41085	0.065256	2.5867	0.34335		0.434464	0.0541732	3.48437	0.432568
MYO1C	AP				1.5716	0.614684	4.01818	0.345217		2.94375	1.02784	8.43095	0.0443133
ZNF574	AP	2			1.90002	0.500808	7.20847	0.345437		1.05251	0.192539	5.75348	0.952914
NEDD4L	AP	6			1.37192	0.710557	2.64887	0.346186		1.05283	0.49425	2.2427	0.893846
NUDT4	AP	2.1			3.75649	0.237945	59.3047	0.347155		0.424063	0.013367	13.4533	0.62671
LIMS1	AP	2			2.02495	0.461921	8.87687	0.34944		0.249582	0.039352	1.58292	0.140841
EPB41L1	ES	18	17	19	3.52279	0.251462	49.3516	0.349797		7.23864	0.634995	82.5171	0.11089
OARD1	AP	3.1			0.322051	0.0290925	3.56508	0.355656		0.0431582	0.00246849	0.754565	0.0313289
DUSP14	AP	2			3.10269	0.276897	34.7662	0.358408		38.8885	4.43581	340.934	0.000950206
ADAM15	AD	22.2	22.1	23	0.368423	0.0437236	3.1044	0.358497		0.247861	0.0228724	2.68599	0.25126
DCAF6	ES	0.00779051	10	14	2.37116	0.373543	15.0515	0.359857		0.53518	0.0591538	4.84191	0.577991
MAP2K6	AP	2			0.451328	0.0816826	2.49376	0.361664		0.627319	0.0897441	4.38501	0.638347
MCU	AP	2			0.221373	0.00853152	5.74413	0.364054		4.23855	0.250232	71.7945	0.317134
EZH2	RI	14.2	14.1	14.3	0.456661	0.0838747	2.48632	0.364647		0.613538	0.0933772	4.03127	0.61104
KLC2	RI	16.2	16.1	16.3	0.144671	0.0021974	9.5248	0.365494		1.2812	0.0349729	46.9357	0.892712
COX4I1	ES	4.2:5.1:5.2:5.3	4.1	5.4	1.37097	0.691333	2.71874	0.3664		0.820657	0.311621	2.16121	0.689111
TUBB3	AP	5.1			0.309574	0.0242987	3.94409	0.366476		0.243382	0.0144736	4.0926	0.326419
ADAMTS12	AT	3.2			0.295307	0.0207915	4.19433	0.367615		0.791842	0.0494732	12.6738	0.86897
SMYD3	AP	2			1.66117	0.547953	5.03597	0.36978		0.87193	0.221696	3.42929	0.844494
STAT1	AT	24.2			0.262254	0.0140675	4.88911	0.369871		1.37341	0.0643425	29.3158	0.838998
HNRNPA2B1	AA	12.2:12.3	11	12.4	0.487145	0.0997687	2.37861	0.374037		1.30221	0.251976	6.72985	0.75268
NAT1	AP	8.1			1.82054	0.482778	6.86517	0.376323		1.08835	0.217227	5.45282	0.917987
MAST4	AP	7			1.74069	0.507438	5.97114	0.378145		3.53399	0.913715	13.6685	0.0673676
PKD1L2	AT	16.2			1.30445	0.721959	2.35691	0.378545		1.09404	0.552205	2.16755	0.796671
SLC25A25	AP				0.668645	0.272406	1.64125	0.379653		1.54968	0.557333	4.30893	0.401159
CALD1	ES	8.3:9	8.2	10	1.93828	0.439681	8.54466	0.381928		4.68935	1.28026	17.1762	0.0196504
KIAA0226	ES	14	13	15	0.580357	0.170568	1.97466	0.383802		0.194188	0.0474765	0.794264	0.02258
BRF1	AP				4.95018	0.132394	185.086	0.386689		1.27979	0.0203957	80.3044	0.907006
SPTBN1	AP				1.68087	0.515914	5.47632	0.388827		2.54464	0.705923	9.17268	0.153393
TMEM242	AT	3.2			2.25422	0.354925	14.3171	0.388828		1.70436	0.196886	14.754	0.628253
B9D1	AT	10			0.289955	0.0173502	4.8457	0.388883		0.317241	0.013952	7.21341	0.471344
MTMR3	ES	20	19	21	2.1275	0.374943	12.0718	0.394004		1.3162	0.183764	9.42721	0.784462
IQCH	AT	6			0.375641	0.0390209	3.61617	0.396754		0.177897	0.0111067	2.84938	0.222448
ADAMTSL2	AP	2			2.41332	0.313023	18.606	0.397882		2.95661	0.324483	26.9399	0.336258
SLC41A3	AP				2.90337	0.244259	34.5108	0.398706		4.71387	0.3806	58.383	0.227202
HS2ST1	AT	10			0.108818	0.000628547	18.8392	0.398955		4.79281	0.0317521	723.448	0.540387
NTM	AP	3.1			1.4586	0.601856	3.53492	0.40328		0.897427	0.347254	2.31927	0.823223
TUBB3	AP	4			1.4043	0.626171	3.14941	0.409962		1.51238	0.611915	3.73792	0.370215
EIF3H	ES	0.2125	3.2	7	0.603858	0.18168	2.00707	0.410442		0.620675	0.1614	2.38685	0.487665
MPPED2	AT	10			1.61241	0.516862	5.03012	0.410507		0.922647	0.220531	3.86013	0.912209
SLC25A16	ES	2.1:2.2	1	3	0.762816	0.3989	1.45873	0.413072		1.66121	0.790903	3.48919	0.180104
TROAP	AT	2.8			1.67136	0.483041	5.78302	0.417355		3.2814	0.82579	13.0391	0.091403
PCDH11X	AT	14.2			0.432329	0.056865	3.28688	0.417807		2.16734	0.388991	12.0758	0.377455
SPEF2	AT	44			0.392192	0.0407015	3.77909	0.41807		0.525754	0.0412671	6.69824	0.620477
DUSP6	AP	2.1			0.232742	0.00678702	7.98127	0.418917		0.748053	0.0144607	38.6969	0.885358
PTPRS	ES	28	27.2	29	0.578135	0.153052	2.18384	0.419047		0.893722	0.205785	3.88144	0.880799
ACSL6	AT	39			0.731162	0.342059	1.56288	0.419163		0.972683	0.428609	2.2074	0.947186
CLSTN1	ES	11	10	12	0.614661	0.188505	2.00424	0.419641		1.11709	0.317124	3.93503	0.86316
RAD51B	AT	12			1.40786	0.609127	3.25395	0.423568		1.12754	0.421528	3.01604	0.811015
MMP19	RI	6.2:6.3	6.1	6.4	0.6439	0.218495	1.89756	0.424689		0.460621	0.128767	1.64772	0.233251
TMC6	RI	14.2	14.1	14.3	0.16063	0.00177763	14.5148	0.426154		0.0233224	9.28236e-05	5.85987	0.182566
CCDC36	AT	12			1.89472	0.390965	9.18228	0.427396		1.45807	0.251123	8.46587	0.674326
MGLL	AP	4			0.508779	0.0931706	2.77831	0.435282		0.279496	0.0313095	2.49503	0.253724
MAST4	AP	4			0.674371	0.249927	1.81963	0.436613		0.65784	0.201793	2.14454	0.487308
EPDR1	AP				0.669848	0.243462	1.84299	0.437758		0.679688	0.219532	2.10437	0.503088
EIF5A	AP				0.125871	0.000657934	24.0807	0.439438		4.04863e-07	2.23522e-10	0.000733322	0.000120178
DST	ES	104	103	105	2.73735	0.212052	35.336	0.440357		0.439613	0.0193563	9.98433	0.605986
NAV1	AP	3.1			0.599942	0.163787	2.19755	0.440511		1.39931	0.392114	4.99363	0.604723
SLC13A3	AT	5			1.493	0.537448	4.14747	0.441989		2.42933	0.83738	7.04774	0.102391
FOXM1	ES	9	8	10	2.24245	0.286119	17.5752	0.442037		0.687212	0.0534381	8.83753	0.773461
PTGER3	AT	8			1.52908	0.513936	4.54938	0.445236		3.74325	1.28503	10.904	0.0155342
RTN4	AP	7			0.737955	0.338093	1.61074	0.445457		0.40347	0.161276	1.00937	0.0523771
WNK1	ES	0.59375	13.2	16	0.669885	0.238769	1.87941	0.446538		0.785117	0.259484	2.37552	0.668451
CDCA3	AT	6			0.412962	0.0423488	4.02698	0.446584		1.30974	0.142435	12.0436	0.811598
CSMD2	AT	17.2			2.03581	0.326201	12.7054	0.446712		4.30238	0.585672	31.6055	0.151531
DZIP3	AP	2			0.386995	0.0334971	4.47099	0.447012		0.179071	0.0101592	3.1564	0.24006
ABLIM2	AT	18.4			1.5198	0.515994	4.47642	0.447575		1.26244	0.369193	4.31689	0.710256
HEATR2	AP				1.29845	0.661579	2.54842	0.447766		1.88428	0.86711	4.09466	0.109624
PHACTR2	ES	8	6	9	0.665748	0.232501	1.90631	0.448467		1.7389	0.590641	5.11949	0.315273
ATP5G1	AD	1.2	1.1	2	4.67644	0.085773	254.964	0.449592		0.523965	0.00442685	62.0169	0.790728
TOM1L2	ES	14	13	15	0.351086	0.0226406	5.44426	0.454227		0.547734	0.0298398	10.0541	0.685148
ABCB5	AT	16			2.36644	0.243367	23.0107	0.457939		0.173398	0.00984259	3.05477	0.231287
CCSER2	ES	11	10	12	1.8694	0.357981	9.76212	0.458183		1.4532	0.22398	9.42849	0.695237
CX3CL1	AP	2.1			0.494402	0.0768701	3.17983	0.458225		0.900563	0.140417	5.77577	0.912046
TMEM2	AP	18.1			0.56045	0.121306	2.58935	0.458374		0.92689	0.17817	4.82194	0.928103
ECM2	AA	4.1	3.1	4.2	1.59664	0.461506	5.52378	0.459979		1.04922	0.261115	4.216	0.946018
BTNL9	AT	7.2			0.686915	0.252505	1.86868	0.462047		1.06483	0.347095	3.26671	0.912548
RPS27A	RI	2.2	2.1	2.3	3.09834	0.15064	63.7262	0.463545		1.7408	0.0472033	64.1985	0.763288
NTM	AP				0.719425	0.29805	1.73653	0.463898		1.06972	0.408645	2.80021	0.890823
RTN4	AP	2.1			1.33882	0.613033	2.92387	0.464084		2.49326	0.994655	6.24977	0.0513512
NSFL1C	ES	5.2	4	7.2	3.42906	0.120646	97.4625	0.470556		78.5632	3.20147	1927.92	0.00752668
PHF19	AP				0.720783	0.295837	1.75613	0.471148		1.03661	0.375396	2.86249	0.944682
PHF19	AP	7			1.38737	0.569429	3.38021	0.471161		0.964668	0.349342	2.66382	0.944664
ATXN2L	ES	22.4:22.6	22.1	22.7	1.56342	0.463461	5.27395	0.471321		1.42061	0.348267	5.7948	0.624516
ABCA9	AT	6.2			2.07047	0.28155	15.2259	0.474661		7.10412	0.957754	52.6946	0.0551434
MARK3	ES	17	16	19	2.17399	0.258241	18.3016	0.474963		3.36939	0.318816	35.6093	0.312622
ARL4A	ES	2.2	1	3.1	1.27081	0.658472	2.45259	0.474975		1.2323	0.581746	2.61037	0.585454
NR4A2	AP				0.768771	0.371912	1.58911	0.47784		1.69942	0.800482	3.60788	0.167406
FLNB	ES	41	40	42	0.74366	0.326779	1.69237	0.480232		0.424758	0.133899	1.34743	0.146031
C19orf53	AP	3			0.175343	0.00137284	22.3953	0.481688		0.0389184	0.000141431	10.7094	0.257358
PNKD	AP	4			0.63442	0.178569	2.25397	0.481736		0.771823	0.180937	3.29236	0.726381
SPECC1	AP				0.424313	0.0384463	4.68294	0.484084		3.0327	0.42321	21.7321	0.269519
MRPL55	ES	1.2:2.2:2.5:2.6:2.8	1.1	2.9	0.573396	0.118662	2.77074	0.488942		1.05303	0.186881	5.93355	0.953292
ZNF695	AT	6			0.759733	0.3486	1.65575	0.48936		1.67043	0.742301	3.75904	0.21503
RPS3A	ES	1.4:2.2:3.1:3.2	1.3	4.1	1.55734	0.443299	5.47107	0.48957		1.57883	0.399109	6.24567	0.515128
LSP1	AP	4			2.18155	0.236585	20.1161	0.491323		1.87861	0.169715	20.7947	0.60723
SORBS2	AP	15			0.728609	0.294559	1.80226	0.493216		1.80565	0.768085	4.24481	0.175432
MLTK	AT	23			1.5778	0.426409	5.83819	0.49452		1.44026	0.33297	6.22981	0.625381
WWP2	AP	15.1			0.728575	0.293362	1.80945	0.495069		1.0942	0.430799	2.77917	0.849873
THOC5	ES	11	10	12.1	0.620934	0.157679	2.44522	0.495613		1.0395	0.231128	4.6752	0.959719
SEPT6	ES	12	11.1	13.2	1.37504	0.544127	3.4748	0.500738		0.548297	0.184833	1.62649	0.278726
ADRA1A	AT	8			1.62201	0.396374	6.63747	0.501097		1.81652	0.342582	9.63199	0.483093
IPO11	AT	32			0.40783	0.029756	5.58965	0.501894		1.53806	0.0837594	28.2432	0.771865
MINK1	ES	2	1	3	0.411838	0.0308995	5.4891	0.501995		1.12743	0.0892428	14.243	0.926156
MAPT	ES	7	6.5	8	1.64193	0.385453	6.99417	0.502453		0.667606	0.0840762	5.30112	0.702303
PDE4DIP	AP				2.60153	0.158552	42.686	0.502991		48.4811	4.25298	552.651	0.00177283
GSTM5	RI	5.2	5.1	5.3	0.692463	0.235525	2.0359	0.504198		0.316088	0.0606585	1.64712	0.17148
EEF1A1	RI	1.2:1.3	1.1	1.4	0.713058	0.263978	1.92612	0.504742		1.06416	0.352638	3.21136	0.912125
FOXP2	AT	28.2			0.534056	0.0844927	3.37563	0.504926		0.737477	0.0914691	5.94597	0.774915
MAST4	AP				0.789611	0.392369	1.58903	0.507961		1.20281	0.553376	2.61439	0.641096
ARHGAP28	AT	20			1.9187	0.277205	13.2804	0.509142		2.67361	0.340062	21.0202	0.349923
RCAN1	AP	7.1			0.692019	0.231042	2.07274	0.510709		1.57328	0.507087	4.88123	0.432776
FGFR1	AP	2			1.95378	0.265003	14.4045	0.511125		0.722265	0.0644434	8.09495	0.79187
FNDC3B	AT	8			0.438827	0.0372139	5.17466	0.512948		4.29056	0.416552	44.1934	0.220959
SLC1A2	AT	13.2			0.671136	0.202854	2.22044	0.513598		0.403913	0.100751	1.6193	0.200679
NEDD4L	AP	3.1			1.27117	0.614467	2.62971	0.517686		0.997496	0.428391	2.32264	0.995362
EGFL7	AP	4			1.2558	0.628792	2.50802	0.518686		2.2069	1.03593	4.70148	0.0402235
TWF1	ES	3	2	4	0.175798	0.000888463	34.7848	0.519327		0.369474	0.00091148	149.769	0.745189
PFKM	AP				1.92588	0.26009	14.2605	0.521141		5.55441	0.830039	37.1686	0.0770791
TACC1	AP				1.28919	0.588757	2.82292	0.525281		0.849149	0.352738	2.04416	0.715249
KSR1	AA	24.1	22	24.2	0.625321	0.146732	2.6649	0.525585		1.0297	0.222894	4.75686	0.970103
ST3GAL3	ES	10	9	13	0.468972	0.0452616	4.8592	0.525589		1.00722	0.0703855	14.4134	0.995771
ZNF587B	AP	2			0.474739	0.0474121	4.75359	0.526226		0.124772	0.00705295	2.20731	0.15566
ZNF106	AP	4.1			1.59707	0.371871	6.85892	0.528942		0.145332	0.0181782	1.16191	0.0689917
ACTB	ES	0.127778	1	5	0.889521	0.61552	1.28549	0.533178		1.18421	0.79539	1.76309	0.405063
PRKAG2	AP	7.1			1.38952	0.492604	3.91953	0.534113		3.16221	1.03563	9.65556	0.0432347
SEPT9	AP	8			1.81792	0.27505	12.0153	0.535053		4.97313	0.67482	36.6497	0.115483
SEC16A	ES	25	23.12	26	1.35385	0.518386	3.53578	0.536232		3.29836	1.22134	8.90759	0.0185514
RUFY3	AP	3			0.476355	0.0447723	5.06818	0.538756		0.152537	0.00645901	3.60234	0.243793
C9orf3	AP	5			0.59687	0.114052	3.1236	0.541112		0.353831	0.0542486	2.30782	0.277534
GNE	AP				0.695985	0.217157	2.23062	0.541934		0.687249	0.201369	2.34549	0.549283
CD47	ES	0.381944	8	11	0.798078	0.385933	1.65036	0.542886		0.473388	0.211795	1.05808	0.0683962
TMEM45A	ES	2	1	3	1.29113	0.566528	2.94252	0.543212		1.15078	0.43908	3.01607	0.775122
MOK	AP	14			1.31228	0.546204	3.15283	0.543395		2.07152	0.826052	5.19481	0.120525
HCAR1	AT	6			0.587404	0.105018	3.28557	0.544706		3.19207	0.629626	16.1832	0.161098
KIAA0195	AP	3			1.4296	0.445204	4.59063	0.548213		1.23517	0.305132	4.99991	0.767185
ADAMTS2	AT	11			0.485071	0.0450895	5.21836	0.550593		2.84579	0.257592	31.4394	0.393494
ZNF385A	AP	2			3.33967	0.0607784	183.509	0.555242		0.593844	0.00574914	61.3398	0.825678
IQGAP2	ES	0.636111	14	17	0.645525	0.148756	2.80125	0.558905		0.56198	0.111604	2.82984	0.48472
CAST	ES	8.2	7.1	9	1.67204	0.298097	9.37849	0.559038		0.9827	0.134562	7.1766	0.986275
ADRA1A	AT	7.2			0.501704	0.049391	5.09621	0.559794		0.651088	0.0463367	9.14859	0.750295
EVI5L	ES	12	11	13	1.57687	0.338985	7.33514	0.561456		0.631765	0.1054	3.78678	0.615224
EXOC7	ES	8.2	6	9	0.765501	0.309203	1.89516	0.56343		0.759887	0.271635	2.12575	0.600863
CFLAR	AT	16			6.07092	0.0132881	2773.62	0.563825		1215.67	2.53756	582394	0.0240906
RHOT1	ES	0.847917	19.3	22	0.424403	0.0230339	7.81968	0.56426		1.90642	0.0986826	36.8296	0.669319
RPL6	AD	1.2	1.1	2	1.79882	0.244382	13.2406	0.564285		1.6548	0.169968	16.1111	0.664453
ARHGEF7	AP				0.495626	0.045321	5.42012	0.565197		1.81999	0.348102	9.51546	0.477974
SYNE3	AT	9.2			0.634315	0.134356	2.99469	0.565394		1.83496	0.37642	8.94502	0.452613
TMEM45A	ES	0.0854167	1	4	0.747667	0.27611	2.02458	0.56722		0.718444	0.232279	2.22216	0.565989
RPL18A	ES	2.2:2.4	1	3	0.801243	0.373646	1.71818	0.569138		1.86295	0.791638	4.38407	0.154197
TSGA10	AP	2			0.746187	0.271664	2.04957	0.570086		0.558729	0.173811	1.79608	0.328554
SLMAP	AP	15.1			0.675973	0.174198	2.62311	0.571368		0.659149	0.144869	2.9991	0.589761
UNG	AP				1.32583	0.497337	3.53449	0.572913		2.35956	0.794905	7.00403	0.121989
LEPR	AT	22			1.41726	0.416888	4.81814	0.576462		0.411317	0.0956294	1.76914	0.232664
AK2	ES	2	1	3	4.3881	0.0242691	793.413	0.577054		0.0346991	5.78134e-05	20.8261	0.303131
COASY	AD	1.2:1.3	1.1	1.5	1.29677	0.519967	3.23408	0.577284		1.46334	0.53835	3.97764	0.455533
TPM2	AA	11.1	9	11.2	2.55397	0.0893275	73.021	0.583638		0.0058396	4.66553e-06	7.30913	0.157555
MYO1C	AP	5			1.66017	0.268939	10.2483	0.585172		0.909924	0.0919719	9.00233	0.935662
ARMC6	AD	1.2	1.1	5	1.51705	0.337921	6.81057	0.586479		2.84594	0.566609	14.2945	0.20405
RBP7	ES	2	1	3	0.691374	0.182055	2.62556	0.587744		0.97837	0.234298	4.08543	0.976078
MTA3	AP				1.68669	0.252416	11.2708	0.589593		11.0042	1.62878	74.3456	0.0138768
NAT1	ES	5.2	3	7	0.671119	0.157189	2.86535	0.590223		1.80785	0.412461	7.924	0.432241
LIG1	AD	24.2	24.1	25	1.50853	0.336014	6.77257	0.591552		0.585099	0.100005	3.42322	0.552075
EZH2	ES	13	12	14.1	1.53895	0.315038	7.51776	0.594243		0.458493	0.0641227	3.27833	0.43718
HDAC4	AT	19.2			0.445631	0.0225533	8.80523	0.595449		0.359349	0.0129798	9.9487	0.54582
IL17RE	AA	15.1:15.2	14	15.3	1.30775	0.483159	3.53964	0.597404		1.20598	0.401878	3.619	0.738338
NUMB	ES	13	12	14	1.3385	0.45025	3.97911	0.599939		0.920732	0.282042	3.00575	0.891178
ZNF527	AT	5.4			0.689982	0.170978	2.78442	0.602138		0.55809	0.115	2.70839	0.469261
PAIP1	AP				1.32421	0.460015	3.81192	0.602675		0.427666	0.11562	1.58189	0.203102
NPEPPS	AP				0.739222	0.233946	2.33579	0.606732		0.178528	0.0332527	0.958487	0.0444936
LYNX1	AP	7			1.23341	0.54874	2.77233	0.61169		1.95092	0.85617	4.44548	0.111741
SLC35A2	AT	6			0.391944	0.010341	14.8555	0.61354		26.5083	1.27666	550.415	0.034193
SOHLH2	AT	13			0.525051	0.0426532	6.46327	0.614965		1.02585	0.0733331	14.3505	0.984874
WRB	AP	2			0.674953	0.144076	3.16196	0.617835		1.88886	0.372021	9.59032	0.442979
CD44	ES	8:9.2:10:11	5	12.1	1.3468	0.411011	4.41318	0.622956		1.62792	0.486164	5.45112	0.429347
NDUFA3	ES	4.3	4.1	5.1	1.60928	0.240392	10.7732	0.623799		2.08234	0.256079	16.9328	0.492735
FAM118A	AP				0.568094	0.0588828	5.4809	0.624884		1.05028	0.113365	9.73038	0.965552
COBLL1	ES	8	7	9	0.49668	0.0298973	8.25127	0.62549		1.40254	0.072324	27.1987	0.823048
PKM	ME	12|13	11	14	0.123971	2.75635e-05	557.581	0.626636		0.00132964	5.22225e-08	33.8541	0.200716
F8	AP				1.28182	0.471321	3.48607	0.626699		0.279868	0.0715717	1.09437	0.0671982
VWA5A	AD	1.2:1.3	1.1	2.2	0.647872	0.111243	3.77316	0.629212		0.848111	0.136653	5.26363	0.859609
CLEC16A	AT	22.2			0.495879	0.0284302	8.64914	0.630606		5.38968	0.323354	89.8354	0.24061
RAB30	AP	2.1			0.553341	0.0495456	6.17988	0.630758		0.615843	0.0421171	9.00494	0.723199
UBE2J2	ES	6.1	5	7	2.39073	0.0682764	83.7122	0.630923		28.6963	0.668933	1231.03	0.0800644
RCAN2	AP				1.72035	0.184826	16.013	0.633614		2.33633	0.205902	26.5098	0.493508
S100A1	AA	4.1	3	4.2	1.27672	0.465634	3.50061	0.635003		0.563467	0.151387	2.09723	0.392286
SNRNP70	ES	8.1	7	9	0.548734	0.045865	6.56511	0.635549		0.314172	0.0180255	5.47579	0.427215
GAS7	AP	2			1.62572	0.215725	12.2516	0.637227		5.77298	0.739466	45.0694	0.0945052
AP1S2	AT	5.2			1.29328	0.443448	3.77175	0.637687		0.423251	0.121449	1.47503	0.177087
IGJ	AP				2.56906	0.0497709	132.609	0.639136		0.122776	0.000938658	16.0589	0.398962
PLEKHA1	ES	15.1	14	16	1.36395	0.371087	5.01329	0.640252		1.14731	0.266834	4.9331	0.853496
BCAR1	AP	7			0.459761	0.0171147	12.3508	0.643504		0.0635219	0.00115731	3.48657	0.177397
ANK3	ME	26|27	25	29.1	0.810641	0.332171	1.97831	0.644667		0.96148	0.359909	2.56855	0.937548
MAST1	AT	14.2			1.14591	0.641862	2.04578	0.6451		1.12586	0.578852	2.18977	0.726901
TCF7L2	ES	0.636111	14	17	0.768692	0.250404	2.35973	0.645737		1.11461	0.338348	3.67182	0.858425
ITIH5	AT	13			1.29242	0.432738	3.85996	0.645871		0.824207	0.235718	2.88191	0.762112
RNF180	AT	5.2			1.31384	0.407697	4.23396	0.647546		0.524894	0.12524	2.19989	0.37799
CDK5RAP2	ES	14	13	15	0.67447	0.1238	3.67454	0.648878		1.3754	0.265296	7.13058	0.704228
PBX3	AP	2			2.26139	0.0669311	76.4051	0.649588		0.453848	0.00787053	26.1708	0.702556
C19orf48	AP	2			0.614422	0.0747262	5.05196	0.650465		1.74735	0.20474	14.9126	0.609936
RTKN	AP	2			1.78828	0.144531	22.1264	0.650631		0.958493	0.0546041	16.8249	0.976865
RGS3	AP	5			1.2238	0.510302	2.9349	0.650888		0.600108	0.215455	1.67149	0.328546
GPAM	RI	19.4	19.3	19.5	0.691069	0.135303	3.52967	0.656955		2.28591	0.505088	10.3455	0.283145
DNASE1L3	RI	9.2	9.1	9.3	1.14625	0.627047	2.09537	0.657407		0.915744	0.456025	1.83891	0.804568
DIXDC1	AP				0.580637	0.0524648	6.42601	0.657606		0.455778	0.0293183	7.08545	0.574606
NPHP1	ES	20	19	21	0.769348	0.234283	2.52641	0.665574		1.02368	0.282955	3.70349	0.971545
DCAF6	ES	11	10	13.1	1.44801	0.270041	7.76445	0.665713		0.421432	0.0582599	3.04849	0.392056
NR4A1	AP	2			1.21742	0.497456	2.97939	0.666586		0.929176	0.335175	2.57587	0.887713
ATXN2L	ES	22.4	22.1	22.6	1.48545	0.243395	9.06576	0.668075		1.6361	0.236778	11.3052	0.61764
EPN2	ES	3	2.3	4	1.77803	0.127759	24.745	0.668374		17.5239	1.06708	287.784	0.0449169
RXRA	AP	3			0.730472	0.172862	3.0868	0.669298		1.53669	0.329631	7.16385	0.584376
NINJ2	AP				0.658272	0.0964082	4.49466	0.669662		1.09648	0.129238	9.30277	0.932716
NCOA7	AP				1.16689	0.569108	2.39257	0.673536		1.35686	0.606051	3.03781	0.45801
TNFRSF19	AP				1.1539	0.590696	2.25411	0.675209		0.887336	0.410062	1.92011	0.761507
HHAT	AP				0.777724	0.239181	2.52886	0.676061		0.650856	0.175436	2.41464	0.52084
ZNF143	AP				1.25198	0.43493	3.6039	0.676985		1.67056	0.595979	4.68264	0.329162
TECR	ES	0.0861111	1	5.3	0.812136	0.303701	2.17176	0.67841		1.07065	0.353051	3.2468	0.904009
ARSG	AP				0.858973	0.418295	1.76391	0.678817		1.75741	0.845679	3.65209	0.130831
LSP1	AP				0.730141	0.163167	3.26724	0.680791		0.705718	0.138374	3.59922	0.675007
CHORDC1	ES	9.2	8.3	9.4	1.42761	0.259715	7.84736	0.682218		0.977274	0.143446	6.65799	0.981266
IGJ	ES	3	2.2	4	0.902902	0.548759	1.48559	0.68766		0.780723	0.433056	1.40751	0.410392
NTF4	AT	7			1.22686	0.442665	3.40029	0.694241		2.51173	0.844975	7.46626	0.0975374
SAA2	AT	5			1.16707	0.538278	2.53039	0.695586		1.80621	0.792827	4.11489	0.159322
CCL14	AP				0.813063	0.287965	2.29567	0.695968		1.41534	0.425113	4.71212	0.571359
MAGOHB	ES	5	4	6	0.526689	0.0207349	13.3785	0.697668		0.104031	0.00230644	4.69226	0.244224
FBXO5	AP	2			1.23702	0.421761	3.62818	0.698427		1.72236	0.502517	5.90332	0.386996
SPAG9	ES	30	29	31	1.20033	0.473536	3.04263	0.700408		1.65644	0.588103	4.66547	0.339476
PI4K2A	AP				1.21578	0.448154	3.29823	0.701192		2.15291	0.780564	5.93802	0.138508
ITGBL1	AT	13			1.62584	0.135105	19.5653	0.701781		0.456827	0.0234294	8.9072	0.605183
LRRN2	AP				1.25464	0.386424	4.07357	0.705773		1.54863	0.422898	5.67099	0.50898
RTN4	ES	6.1:6.2	5	8	1.19946	0.465957	3.08765	0.706172		0.771412	0.251279	2.36819	0.650187
MBNL2	ES	9	8	11	1.35682	0.269074	6.84178	0.711641		2.69609	0.515262	14.1072	0.240137
SVIL	ES	16	15	17	1.56307	0.144954	16.8549	0.712774		0.0276213	0.000445189	1.71373	0.0883449
ST6GALNAC6	AP	3			1.47596	0.184806	11.7878	0.713443		0.797955	0.0688401	9.24945	0.856729
MID1	AP	4			1.1653	0.51387	2.64254	0.714217		1.02679	0.393244	2.68104	0.956942
ENTPD1	AP	2			1.37258	0.251477	7.49168	0.714552		0.323116	0.0369182	2.82798	0.307387
NFASC	AT	20.2			1.21866	0.420227	3.53414	0.715833		2.83782	0.980526	8.21317	0.054393
SF3B1	AT	4.4			0.610726	0.0422982	8.818	0.717361		1.56763	0.0840026	29.2546	0.763346
BCL2	AT	1.4			0.586073	0.0318133	10.7968	0.719271		5.20381	0.249046	108.733	0.287521
MYO18A	ES	41	40	42	1.20093	0.441783	3.26457	0.719708		2.52196	0.86504	7.35261	0.0901888
NPLOC4	AP	16.1			0.812741	0.256336	2.57688	0.724706		1.41963	0.405049	4.97559	0.583967
RCAN1	AP				1.38209	0.22804	8.37645	0.724841		2.33531	0.321588	16.9586	0.401779
KANK1	AP				1.19946	0.435183	3.30595	0.725151		3.23821	1.14671	9.14438	0.0265253
P2RY6	AP	4			0.877028	0.417085	1.84418	0.729327		0.960078	0.41679	2.21155	0.923764
TANK	AT	7.2			1.83175	0.057651	58.2003	0.731598		43.8273	2.17886	881.579	0.0135671
ENSA	AP	2			0.280114	0.000180106	435.654	0.734331		0.709998	0.000224473	2245.69	0.933619
SRBD1	AP	10			0.68536	0.0760516	6.17632	0.736258		0.0755052	0.00384653	1.48213	0.0889593
PRRG1	AT	5			0.64705	0.0506178	8.27126	0.737739		2.1385	0.169312	27.0104	0.55692
TNC	ES	19	11	20	0.832088	0.280228	2.47074	0.74062		1.10821	0.328886	3.73419	0.868338
ZNF670	AT	11			1.30986	0.263393	6.51393	0.741541		2.93501	0.527438	16.3323	0.218894
FBLN2	ES	11	10	12	0.818011	0.245731	2.72307	0.743383		0.27227	0.0654364	1.13287	0.0737014
TNC	ES	0.679387	11	20	0.790843	0.191764	3.26147	0.745477		1.36938	0.29912	6.26911	0.685467
HYAL1	AP				0.871915	0.380028	2.00047	0.746326		1.53663	0.577425	4.08925	0.389652
HYAL1	AP	4.1			1.1469	0.499882	2.63138	0.746326		0.650775	0.244544	1.73183	0.389652
FGF13	AP	4			1.12451	0.547473	2.30974	0.749323		1.23798	0.56754	2.70043	0.591623
NPAS3	AT	9			1.23321	0.340043	4.47238	0.749798		1.27605	0.318056	5.11957	0.730919
MMP19	RI	6.5	6.4	6.6	0.665629	0.0527252	8.40323	0.753054		0.486319	0.027961	8.45842	0.620804
ARHGEF6	AP	4			0.881134	0.397043	1.95545	0.7557		1.9577	0.821112	4.66757	0.129681
C5orf58	AT	3			1.12195	0.542644	2.3197	0.756189		0.95481	0.408233	2.23319	0.915051
APOLD1	AT	4			0.792778	0.182735	3.43939	0.756457		0.539017	0.103469	2.80799	0.463014
LRRC23	AD	3.2	3.1	4	0.827917	0.250494	2.73638	0.756863		0.573935	0.143141	2.30124	0.433244
RDM1	AT	6			1.15635	0.458425	2.91681	0.758289		1.2835	0.463227	3.55629	0.631223
MRPL32	AD	2.2	2.1	3	2.0869	0.0190482	228.638	0.758829		3.81719	0.031388	464.221	0.584473
LRRFIP1	ES	15	14	16	1.80725	0.0397265	82.216	0.761251		6.85456	0.108378	433.529	0.362956
RPS6	AD	1.2:1.3:1.4	1.1	1.6	0.518766	0.00743352	36.2034	0.761898		3.78702	0.063504	225.836	0.523226
DUT	AP	3.1			0.840935	0.271134	2.6082	0.764193		1.43034	0.402876	5.07815	0.57982
CXCL12	AT	5.2			1.40618	0.150627	13.1275	0.764873		0.786365	0.0659161	9.38117	0.8493
ZNF331	AP	5			0.715826	0.0799908	6.40583	0.764946		1.36888	0.132439	14.1486	0.792175
LY6K	RI	2.2:2.3	2.1	2.4	1.07695	0.662141	1.75162	0.76516		1.3287	0.774435	2.27964	0.302137
PIK3R1	AP	8			1.22788	0.31081	4.85086	0.769621		0.716269	0.141527	3.62506	0.686701
ERBB2IP	ES	22	21	24.1	0.835782	0.249056	2.80472	0.771505		0.459004	0.114858	1.8343	0.270603
SETBP1	AT	5			0.660839	0.0392882	11.1155	0.773618		2.13416	0.109476	41.6039	0.616901
NPIPA8	ES	3	2	4	1.25139	0.271348	5.77111	0.7737		3.09474	0.855077	11.2007	0.0851787
TPM1	ES	3.1:3.2	2.2	5.2	0.800972	0.166659	3.84952	0.781722		0.857401	0.147766	4.97502	0.863833
CASKIN2	AP	3			1.38781	0.134458	14.3243	0.783179		0.316415	0.0188115	5.3222	0.424273
KIDINS220	ES	3	2	4	1.12357	0.485862	2.59829	0.785321		1.75114	0.753869	4.06765	0.192604
TRAK1	AP				0.823575	0.203568	3.33194	0.785474		0.9463	0.206526	4.33595	0.943341
HMGB1	AP	4.1			0.446	0.00130064	152.937	0.786313		0.360385	0.000652608	199.013	0.75139
CLASP2	AP	8			0.741222	0.0841969	6.5253	0.78729		0.153633	0.0110099	2.14381	0.163648
LETM2	AT	3.6			1.17557	0.360889	3.82933	0.788349		0.720034	0.185708	2.79175	0.634746
SORBS1	ES	0.594444	13	17	1.12806	0.466612	2.72713	0.789055		1.1467	0.435542	3.01905	0.781665
CHD6	RI	8.2	8.1	8.3	0.877289	0.333899	2.30499	0.790525		0.77011	0.248027	2.39115	0.651351
NMT2	RI	8.2	8.1	8.3	0.84487	0.240601	2.96676	0.792516		1.09325	0.281829	4.24083	0.897437
ARAP1	AP	2			1.2622	0.221536	7.19133	0.793101		0.913904	0.130029	6.42335	0.927897
AKAP17A	ES	4.3	4.1	5	1.26467	0.209433	7.63681	0.797995		0.489598	0.055445	4.32332	0.520472
MEF2BNB	AT	4.2			0.800192	0.144218	4.43985	0.798752		2.60109	0.446351	15.1577	0.287791
PAAF1	ES	4.2	3.2	5	0.704531	0.0469106	10.5811	0.79999		1.52868	0.0766313	30.4951	0.781083
MELK	ES	8	7	9	0.923358	0.498178	1.71141	0.800057		0.853844	0.429253	1.69842	0.652479
SCHIP1	AP				0.922435	0.490956	1.73312	0.801879		1.75775	0.925135	3.3397	0.085007
MCF2L	AP	10			1.17186	0.337461	4.0694	0.802825		0.505982	0.121546	2.10634	0.349164
CLSTN1	ES	3	2	4	0.826731	0.183553	3.72364	0.804289		0.721589	0.136509	3.81433	0.700911
SLC14A2	AT	13.2			1.11282	0.472091	2.62317	0.806965		0.589101	0.208394	1.66531	0.318261
ERMP1	AT	17			0.451591	0.000724	281.678	0.808699		7.95852	0.00719935	8797.75	0.561838
GNAS	AP				1.06927	0.615169	1.85857	0.81231		0.83172	0.441307	1.56752	0.568784
SMARCC2	ES	28.3	28.1	29	0.901588	0.377879	2.15111	0.815373		1.61338	0.637857	4.08084	0.312361
JAM2	AT	11			0.84373	0.202053	3.52323	0.815753		3.44273	0.768967	15.4134	0.105994
TRIM36	AT	3			1.19367	0.261058	5.45797	0.819437		0.234441	0.0322352	1.70505	0.151894
BCAR1	AP				0.789242	0.101608	6.13048	0.820975		0.0688475	0.00467359	1.0142	0.0512133
SH3YL1	AP				1.42736	0.0627551	32.465	0.823367		1.4617	0.0565869	37.7574	0.819014
TCF7L2	ES	15	14	17	0.79204	0.101742	6.16586	0.823794		0.377101	0.0344066	4.13308	0.424673
GABARAP	ES	1.2:1.3:1.5	1.1	2.1	1.09737	0.474758	2.53649	0.827936		1.81667	0.739671	4.46182	0.192845
USP6	AP				0.86083	0.221494	3.34559	0.828702		0.976662	0.227768	4.1879	0.974638
MBNL2	ES	0.381944	8	11	1.08496	0.516189	2.28046	0.829641		1.15403	0.50102	2.65813	0.736481
ZNF263	AP				0.763971	0.0653847	8.92643	0.830037		1.61938	0.108036	24.2736	0.727109
TCF12	ES	18	17	19	0.899296	0.32773	2.46768	0.836716		1.11443	0.363992	3.41205	0.849485
TACC1	AP	5.1			0.919165	0.412061	2.05034	0.836856		1.20819	0.490374	2.97674	0.681017
PDZRN3	AP	6			0.89006	0.293175	2.70216	0.837141		0.475676	0.112407	2.01293	0.312743
SLC2A13	AT	4.2			0.779063	0.0715767	8.47956	0.837595		0.123742	0.00620792	2.46656	0.171116
LPHN2	ES	15	14	16	0.874831	0.241263	3.17218	0.83877		0.619371	0.143702	2.66956	0.520437
FAXDC2	AD	9.2	9.1	10.1	1.18881	0.224439	6.29688	0.838873		0.943309	0.141475	6.28969	0.951925
SLC22A18	AP	3			0.81784	0.114709	5.83094	0.840974		1.76481	0.23204	13.4224	0.583182
FLVCR2	AP	2			1.18113	0.222344	6.27438	0.845098		0.295111	0.0367433	2.37024	0.250927
LRRFIP1	AT	26			0.852478	0.165023	4.40374	0.848911		3.18391	0.56678	17.8858	0.18845
CD44	ES	6:7:8:9.2:10:11:12.1:13:14	5	15	1.08207	0.479407	2.44234	0.84939		1.05013	0.41804	2.63794	0.91711
CTNND1	ES	3:4.2:4.3	2.1	5	0.718156	0.0232642	22.1691	0.849943		0.510027	0.0105008	24.7721	0.733972
FBLN5	ES	7	5	8	1.08837	0.447475	2.6472	0.851864		1.53558	0.581392	4.05579	0.386743
NDRG2	ES	4.2:4.5	4.1	5.2	1.11552	0.351494	3.54026	0.852816		1.57429	0.433951	5.71123	0.490053
TUBB3	ES	6.1:6.2	5.4	7.1	1.14031	0.278156	4.67476	0.855268		0.594385	0.111513	3.16817	0.542311
CLEC1A	ES	2	1	3	0.937249	0.464896	1.88953	0.856241		0.855698	0.383064	1.91148	0.703923
BOC	AT	6.2			1.31016	0.0647311	26.5175	0.860261		2.34083	0.0873587	62.7239	0.612193
MUM1	ES	5.1	4	6	0.879436	0.206566	3.74413	0.862008		0.70822	0.139411	3.59781	0.677387
PRKAR1B	AP	5			0.893344	0.245592	3.24956	0.864078		0.604293	0.134865	2.70766	0.51038
TNC	ES	0.679861	11	20	0.941198	0.465738	1.90204	0.86593		0.909753	0.403112	2.05315	0.819842
MKL2	AP	4			0.920966	0.353434	2.39983	0.866198		0.41365	0.132911	1.28737	0.127536
COASY	AA	1.3:1.4	1.1	1.5	0.905556	0.284929	2.87802	0.866461		2.04807	0.637908	6.57557	0.228365
APP	ES	10	8	11	1.26114	0.0769952	20.6568	0.870803		0.72663	0.0267045	19.7716	0.849734
PAK6	AP	2			0.869692	0.160923	4.70017	0.87116		0.88537	0.120931	6.48205	0.904591
LIMS1	AP	6			1.08483	0.404669	2.90819	0.871435		0.728965	0.213795	2.48551	0.613464
TCF7L2	ME	16|17	14	19	0.883933	0.196548	3.9753	0.872224		4.3518	1.13976	16.6159	0.0314495
EPB41	ES	0.679167	15	19.1	1.05291	0.554638	1.99881	0.87474		1.62696	0.799553	3.31059	0.17934
ABCD3	ES	2	1	3	1.2681	0.0637724	25.216	0.87627		0.380392	0.0118861	12.1737	0.584657
PLEKHG5	AP	4.1			0.908827	0.2709	3.04897	0.876977		1.60666	0.425575	6.06558	0.484208
RPS6	ES	1.2:1.3:1.4:1.6:2:3	1.1	4	1.16076	0.173354	7.77236	0.877878		0.725848	0.0458949	11.4796	0.82007
PLEKHM3	AT	8			1.08543	0.378014	3.11668	0.878937		1.93708	0.704655	5.32499	0.200017
PPFIBP1	ES	11	10	12	0.888391	0.193514	4.07846	0.879036		1.13183	0.216312	5.9222	0.883394
NPNT	ES	5	4	6	1.26987	0.0569507	28.315	0.880108		0.426368	0.00779198	23.3304	0.67634
MORN1	AT	8			0.937883	0.403372	2.18068	0.88158		0.979595	0.378922	2.53246	0.966067
MAP4K4	ES	18	16.2	19	1.18937	0.119869	11.8012	0.882249		0.768142	0.0519316	11.3619	0.847817
CDIP1	AP	3.1			1.09571	0.321252	3.73721	0.88391		1.00486	0.228385	4.42127	0.994879
PLEKHA1	ES	15.1:15.2	14	16	1.21703	0.0859866	17.2255	0.884498		2.32292	0.148823	36.2575	0.547728
CAB39L	AP				1.06226	0.466145	2.42068	0.885726		1.22454	0.472117	3.17613	0.676998
ATXN2L	AD	22.2:22.3:22.4	22.1	22.6	1.13394	0.195258	6.58521	0.888622		4.10758	0.641879	26.2856	0.135746
ATXN2L	ES	22.2:22.3:22.4:22.6	22.1	22.7	0.921372	0.290168	2.92564	0.889517		1.9692	0.556718	6.96536	0.293124
PLAGL1	AP				1.09171	0.313995	3.7957	0.890232		0.181168	0.0337329	0.972991	0.0463832
MTSS1	ES	7	6	8.3	1.06801	0.401012	2.84443	0.895257		1.65228	0.548098	4.98089	0.372431
C12orf73	ES	4.1:5	2.4	6	0.924486	0.276092	3.09562	0.898672		0.55299	0.139071	2.19887	0.400253
DBNDD1	AP	2			0.913576	0.224961	3.71006	0.899405		2.4764	0.533315	11.4989	0.247062
CTNND1	ES	21	20	22.1	0.955065	0.466275	1.95625	0.899987		0.844438	0.372817	1.91267	0.685229
C12orf73	ES	3:4.1:5	2.4	6	1.13783	0.146486	8.83808	0.901747		0.839089	0.083944	8.3874	0.88127
GPT	AP				1.11233	0.201842	6.12993	0.9027		0.112645	0.011619	1.09209	0.0595708
GSDMD	AP				1.26331	0.0283469	56.301	0.903965		5.67716	0.0883978	364.604	0.413553
MBNL2	ES	7	6.3	8	0.942425	0.353788	2.51045	0.905573		2.51	0.833129	7.56197	0.101942
MCF2L	AP	9			0.861047	0.0568964	13.0307	0.914055		1.2295	0.0600866	25.158	0.893285
PCGF5	AT	4			1.05977	0.360115	3.11878	0.916044		1.17523	0.350419	3.94144	0.793694
NAV2	AP				1.09246	0.209156	5.70614	0.916495		0.699875	0.094753	5.16949	0.726507
SEPT11	AT	11.2			1.20039	0.0357851	40.2661	0.918833		0.969893	0.0200024	47.029	0.987684
TPST2	AP	3			1.10156	0.143352	8.46474	0.925927		0.869245	0.0757247	9.97808	0.910397
MARK3	ES	0.720833	16	19	0.937027	0.204222	4.29934	0.933313		1.75581	0.314802	9.79303	0.520915
LIMS1	AP	3			0.877759	0.0389544	19.7786	0.934617		0.0787949	0.00167638	3.70361	0.195853
PARD6G	AT	3			0.956692	0.32756	2.79417	0.935473		1.95174	0.61071	6.23745	0.259285
NACA	AD	1.2	1.1	2.2	1.36119	0.000764831	2422.55	0.935638		0.403812	9.27267e-05	1758.55	0.832019
CADM1	ES	10	9	12	0.950855	0.256114	3.53017	0.939979		1.31714	0.308453	5.62442	0.709951
MYL6	AD	4.2:4.3	4.1	5	1.18684	0.0136958	102.848	0.940022		1.5945	0.0134239	189.396	0.848201
RBM33	AT	7.2			1.10174	0.0781423	15.5337	0.942787		0.373196	0.0160549	8.67494	0.539186
PSMG4	AT	8			1.1162	0.0494056	25.2177	0.944904		0.351053	0.00931526	13.2297	0.571853
CD46	ES	13	12	14	1.05212	0.242738	4.56025	0.94587		2.26489	0.455513	11.2614	0.317774
NEK2	AT	7.2			1.06954	0.14076	8.12669	0.948195		0.533967	0.0561086	5.08158	0.5852
SPATA2	AP	2			0.925187	0.0815635	10.4945	0.949962		0.114009	0.003684	3.52826	0.214977
LAS1L	AD	11.2	11.1	12	0.875185	0.0105584	72.5442	0.952832		1.3841	0.0217127	88.2306	0.878136
TCF7L2	ES	16	14	17	0.947642	0.15783	5.68983	0.953108		1.18858	0.168187	8.39976	0.862525
TGFBR3	AP				1.05548	0.162058	6.8743	0.954963		0.182727	0.0198133	1.68519	0.133729
GAS7	AP				1.02412	0.432212	2.42666	0.956811		1.76115	0.629124	4.93011	0.281213
TNFRSF10C	AT	4.3			1.02337	0.429094	2.44068	0.95846		2.60384	1.12916	6.00446	0.0247737
EPB41L5	AT	26			0.950703	0.125998	7.1734	0.960896		2.94474	0.408307	21.2376	0.283995
CD44	ES	6:7:8:9.2:10:11	5	12.1	1.01523	0.553175	1.86321	0.961096		1.20283	0.621604	2.32754	0.583469
CAPG	AP	2			0.976878	0.359152	2.65706	0.963452		0.803422	0.255818	2.52323	0.707769
CENPK	AT	6.2			0.957439	0.141418	6.48214	0.964449		0.703744	0.0853856	5.80023	0.744064
CROT	AT	5.2			0.964294	0.173617	5.35583	0.966847		0.351652	0.0422586	2.92625	0.333669
RBM26	ES	14	13.2	15	0.95658	0.117899	7.76128	0.966851		1.67657	0.169371	16.5961	0.658626
SVEP1	AT	28.2			0.974419	0.278568	3.40847	0.967645		1.08258	0.256186	4.57473	0.914067
RPL28	AT	2.4			0.956073	0.0950018	9.62167	0.969583		1.88112	0.150942	23.4436	0.623489
PHF19	AT	5.2			0.978265	0.303339	3.15489	0.970658		1.35908	0.369199	5.00297	0.644501
ERBB2IP	ES	22:24.1:24.2:24.3	21	25	1.01132	0.547745	1.86723	0.971306		0.596971	0.298012	1.19584	0.145558
KIAA1217	AP	9			0.974651	0.200992	4.72628	0.974572		0.726311	0.1193	4.42184	0.72861
MAF1	AP	2			0.96506	0.0765119	12.1725	0.978061		3.21109	0.191411	53.8689	0.417459
PDLIM5	ES	13	8.2	14	0.960176	0.037736	24.4313	0.980366		0.0374727	0.000457943	3.06633	0.143913
EPB41L2	AP	3			0.978295	0.162692	5.88266	0.980873		0.236365	0.0263951	2.11662	0.197197
SLC16A3	AP	2			1.00608	0.48043	2.10686	0.987175		2.26817	1.00987	5.09429	0.0472824
MAPKAP1	AT	9			0.976697	0.0505157	18.884	0.987552		2.87882	0.10688	77.5411	0.529177
SVIL	ES	0.424444	9	13	0.991964	0.349068	2.81891	0.98792		1.02402	0.320349	3.27338	0.968063
HAPLN3	ES	5	4	6	0.995543	0.358947	2.76114	0.993152		1.31626	0.436578	3.96846	0.625524
PCSK5	AT	14.2			0.996236	0.41247	2.4062	0.993313		1.23828	0.473653	3.23726	0.662918
ARHGEF25	AP				0.995208	0.306632	3.23006	0.99362		0.848299	0.22647	3.17751	0.807098
DYNC1I2	ES	8	7.3	9	0.998333	0.386354	2.57968	0.997252		2.38977	0.950149	6.01063	0.0641267

## Sheet: Multi cox
Supplementary Table S3-2: Multi survival analyses of DEAS for OS and DFS
Survival analyses	symbol	Univariate analysis					Mulitiple analysis
		HR	95%CI		p value		HR	95%CI		p value
OS	AP_CCSER2_ID_12405	0.374639	0.16078	0.872956	0.0229199		0.196498	0.0798956	0.483273	0.000394589
	AT_SGOL1_ID_63698	19.4648	1.89772	199.649	0.0124423		31.7475	2.91865	345.333	0.0045174
	AT_ELK4_ID_9560	0.00552134	5.58131e-05	0.546202	0.0265577		3.15376e-05	1.14053e-07	0.00872072	0.000302585
	ES_DENND1A_ID_87517	6.75933	1.33351	34.2619	0.0210266		11.5696	2.05165	65.2435	0.00553281
	AP_HNRNPF_ID_11322	0.0521736	0.00354858	0.767091	0.0312954		0.0129914	0.000587883	0.287092	0.00595734
	ES_GK_ID_88736	3.5423	1.05462	11.8981	0.0407574		4.9744	1.42956	17.3092	0.0116794
	AA_RPS21_ID_60075	2.7554	1.09767	6.91665	0.0308954		2.67625	0.974587	7.34906	0.0561309
	ES_DAPK2_ID_31077	4.53947	1.81986	11.3233	0.00117921		5.00304	1.90662	13.1282	0.0010715
	ES_CORO7_ID_33670	0.0194944	0.00114164	0.332882	0.00653396		0.0280104	0.00146413	0.535868	0.0175835
	ES_RAB7A_ID_66662	0.0405283	0.00216286	0.75943	0.0320322		0.0257577	0.00137978	0.480845	0.0142739
	AT_RNF165_ID_45395	0.44948	0.2095	0.964355	0.0400576		0.336953	0.14755	0.769484	0.00982584
	ES_MAP2K7_ID_47194	0.358041	0.130917	0.979193	0.0454004		0.114759	0.035558	0.370372	0.000292942
	AP_ZKSCAN5_ID_80654	15.1968	1.76321	130.978	0.0132855		10.9011	1.06464	111.618	0.044142
DFS	AT_CFLAR_ID_56795	1215.67	2.53756	582394	0.0240906		4450.84	6.45248	3.07013e+06	0.0117678
	ES_EPN2_ID_39700	17.5239	1.06708	287.784	0.0449169		95.0174	5.7656	1565.89	0.00144586
	AP_HNRNPF_ID_11322	0.0261143	0.00118717	0.57444	0.020806		0.00382944	0.000125225	0.117106	0.00142805
	AT_PCDHA5_ID_73777	7.02879	1.91636	25.7801	0.00327256		11.6479	3.06054	44.3297	0.00031782
	ES_DPF2_ID_16815	3.2109e-05	1.15825e-08	0.0890127	0.0105267		3.93712e-06	1.6894e-09	0.00917542	0.00165643
	AP_DUSP14_ID_40523	38.8885	4.43581	340.934	0.000950206		51.1585	5.29293	494.47	0.000674704
	ES_GK_ID_88736	4.39271	1.32456	14.5678	0.0155426		4.87332	1.37029	17.3315	0.0144207
	AP_MYO1C_ID_38307	2.94375	1.02784	8.43095	0.0443133		3.27481	1.10378	9.71598	0.0325227
	ES_NSFL1C_ID_58506	78.5632	3.20147	1927.92	0.00752668		54.0967	2.12094	1379.79	0.015738
	AP_NFIB_ID_85879	0.0124476	0.000772478	0.200578	0.0019831		0.00325888	0.000169449	0.0626757	0.000146996
